# Supplementary material for: Butein Increases Resistance to Oxidative Stress and Lifespan with Positive Effects on the Risk of Age-Related Diseases in Caenorhabditis elegans
Source: MDPI journal article supplement (doi:10.3390/antiox13020155), 2024-01-26
Supplement: s1 [file s1]

Table S1: Effect of butein on lifespan in *C. elegans*

|                            | <b>Butein (mM)</b> | <b>Mean lifespan (d)</b> | <b><i>P</i> value<sup>1)</sup></b> | <b>% effect<sup>2)</sup></b> |
|----------------------------|--------------------|--------------------------|------------------------------------|------------------------------|
| 1 <sup>st</sup> experiment | 0                  | 22.7                     |                                    |                              |
|                            | 1                  | 25.0                     | < 0.001                            | 10.1                         |
| 2 <sup>nd</sup> experiment | 0                  | 20.7                     |                                    |                              |
|                            | 1                  | 23.1                     | 0.002                              | 11.6                         |
| 3 <sup>rd</sup> experiment | 0                  | 20.0                     |                                    |                              |
|                            | 1                  | 21.3                     | 0.042                              | 6.5                          |

<sup>1)</sup> *P* value was calculated using the log-rank test by comparing the survival of the untreated control group (0 mM butein) to that of butein-treated group (1 mM butein).

<sup>2)</sup> % effects were calculated by  $(C-B)/C \times 100$ , where *B* is the mean lifespan of butein-treated group and *C* is the mean lifespan of the untreated control group.

Table S2: Effect of *daf-16* or *bec-1* knockdown on lifespan extension by butein

|                            | RNAi          | Mean lifespan (d) |               | <i>P</i> value <sup>1)</sup> |
|----------------------------|---------------|-------------------|---------------|------------------------------|
|                            |               | Control           | Butein (1 mM) |                              |
| 1 <sup>st</sup> experiment | <i>daf-16</i> | 15.9              | 15.2          | 0.399                        |
|                            | <i>bec-1</i>  | 24.8              | 26.7          | 0.260                        |
| 2 <sup>nd</sup> experiment | <i>daf-16</i> | 14.7              | 14.4          | 0.255                        |
|                            | <i>bec-1</i>  | 20.3              | 21.3          | 0.911                        |
| 3 <sup>rd</sup> experiment | <i>daf-16</i> | 13.9              | 13.9          | 0.898                        |
|                            | <i>bec-1</i>  | 24.2              | 24.6          | 0.815                        |

<sup>1)</sup> *P* value was calculated using the log-rank test by comparing the survival of the untreated control group (0 mM butein) to that of butein-treated group (1 mM butein).
